# Supplementary material for: Occurrence of Fusarium Mycotoxins and Their Modified Forms in Forage Maize Cultivars
Source: PubMed Central journal article supplement (PMC7913079; doi:10.3390/toxins13020110), 2021-02-02
Supplement: toxins-13-00110-s001.pdf [file toxins-13-00110-s001.pdf]

## Supplementary Materials: Occurrence of *Fusarium* Mycotoxins and Their Modified Forms in Forage Maize Cultivars

Tim Birr, Tolke Jensen, Nils Preußke, Frank D. Sönnichsen, Marthe De Boevre, Sarah De Saeger, Mario Hasler, Joseph-Alexander Verreet and Holger Klink

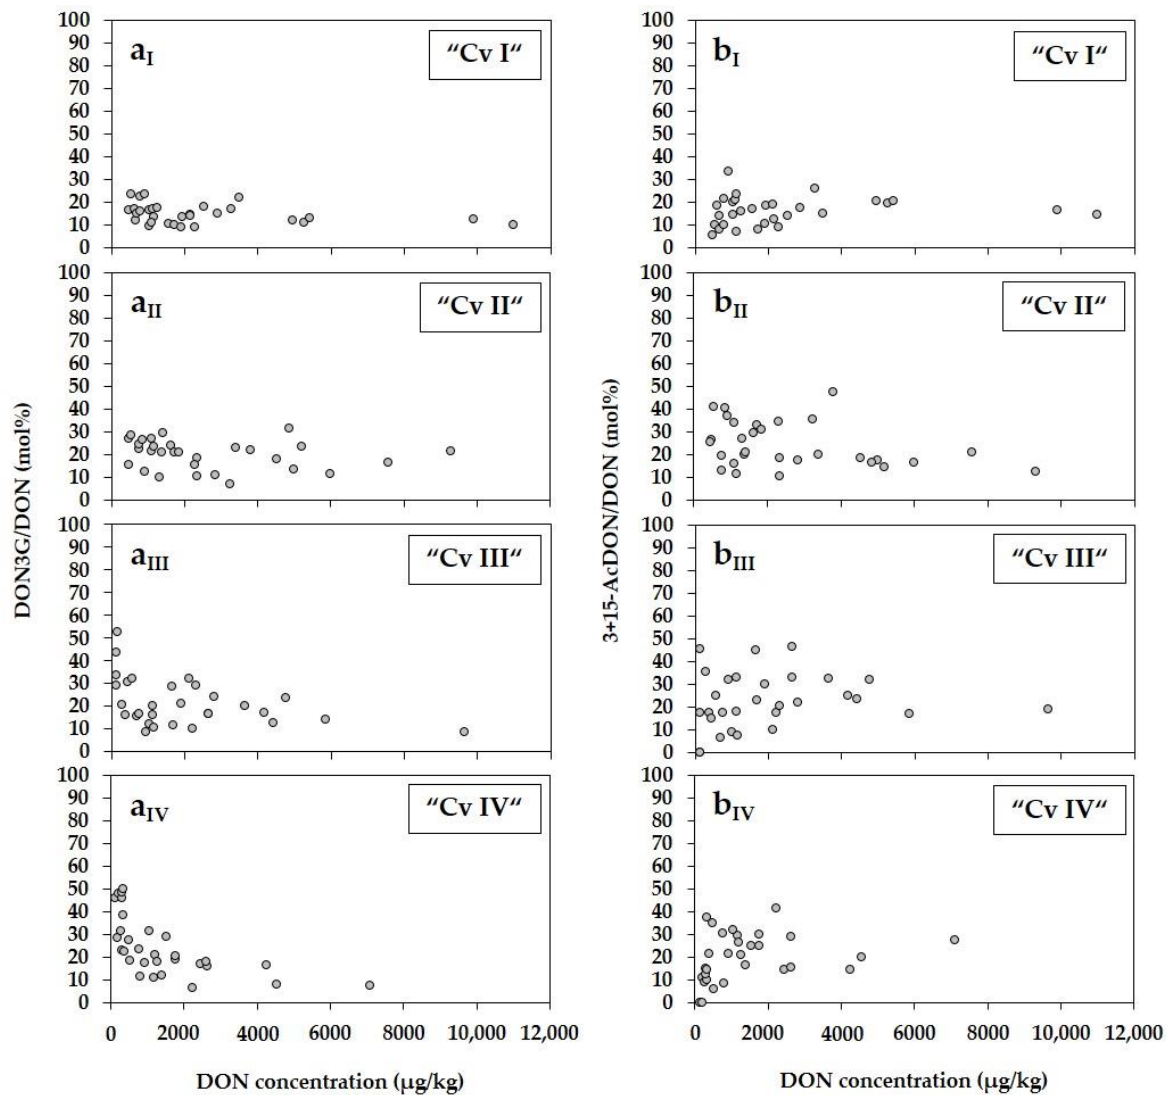

**Figure S1.** Relationship between measured DON concentrations ( $\mu\text{g}/\text{kg}$ ) and ratios of (a) DON3G/DON (mol%), and (b) 3+15-AcDON/DON (mol%) in forage maize samples of four different cultivars (Cv). DON = deoxynivalenol; DON3G = deoxynivalenol-3-glucoside; 3+15-AcDON = sum of 3- and 15-acetyl-deoxynivalenol.  $n = 120$ .

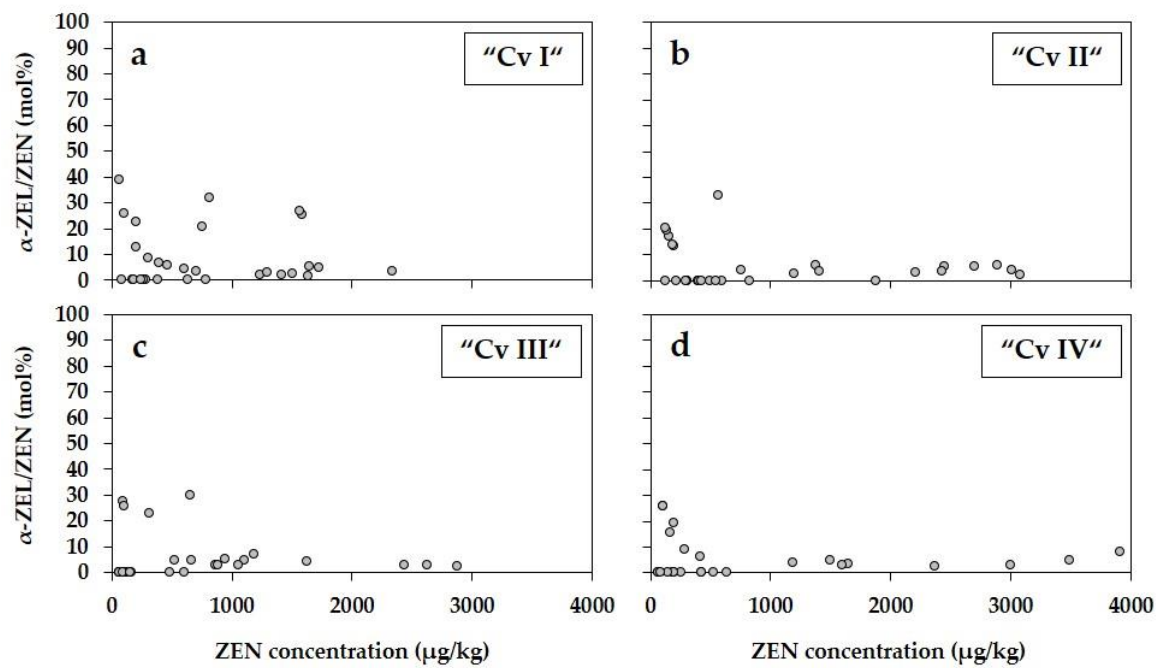

**Figure S2.** Relationship between measured ZEN concentrations ( $\mu\text{g}/\text{kg}$ ) and ratios of  $\alpha\text{-ZEL}/\text{ZEN}$  (mol%) in forage maize samples of four different cultivars (Cv) (a–d). ZEN = zearalenone;  $\alpha\text{-ZEL}$  =  $\alpha$ -zearalenol.  $n = 120$ .

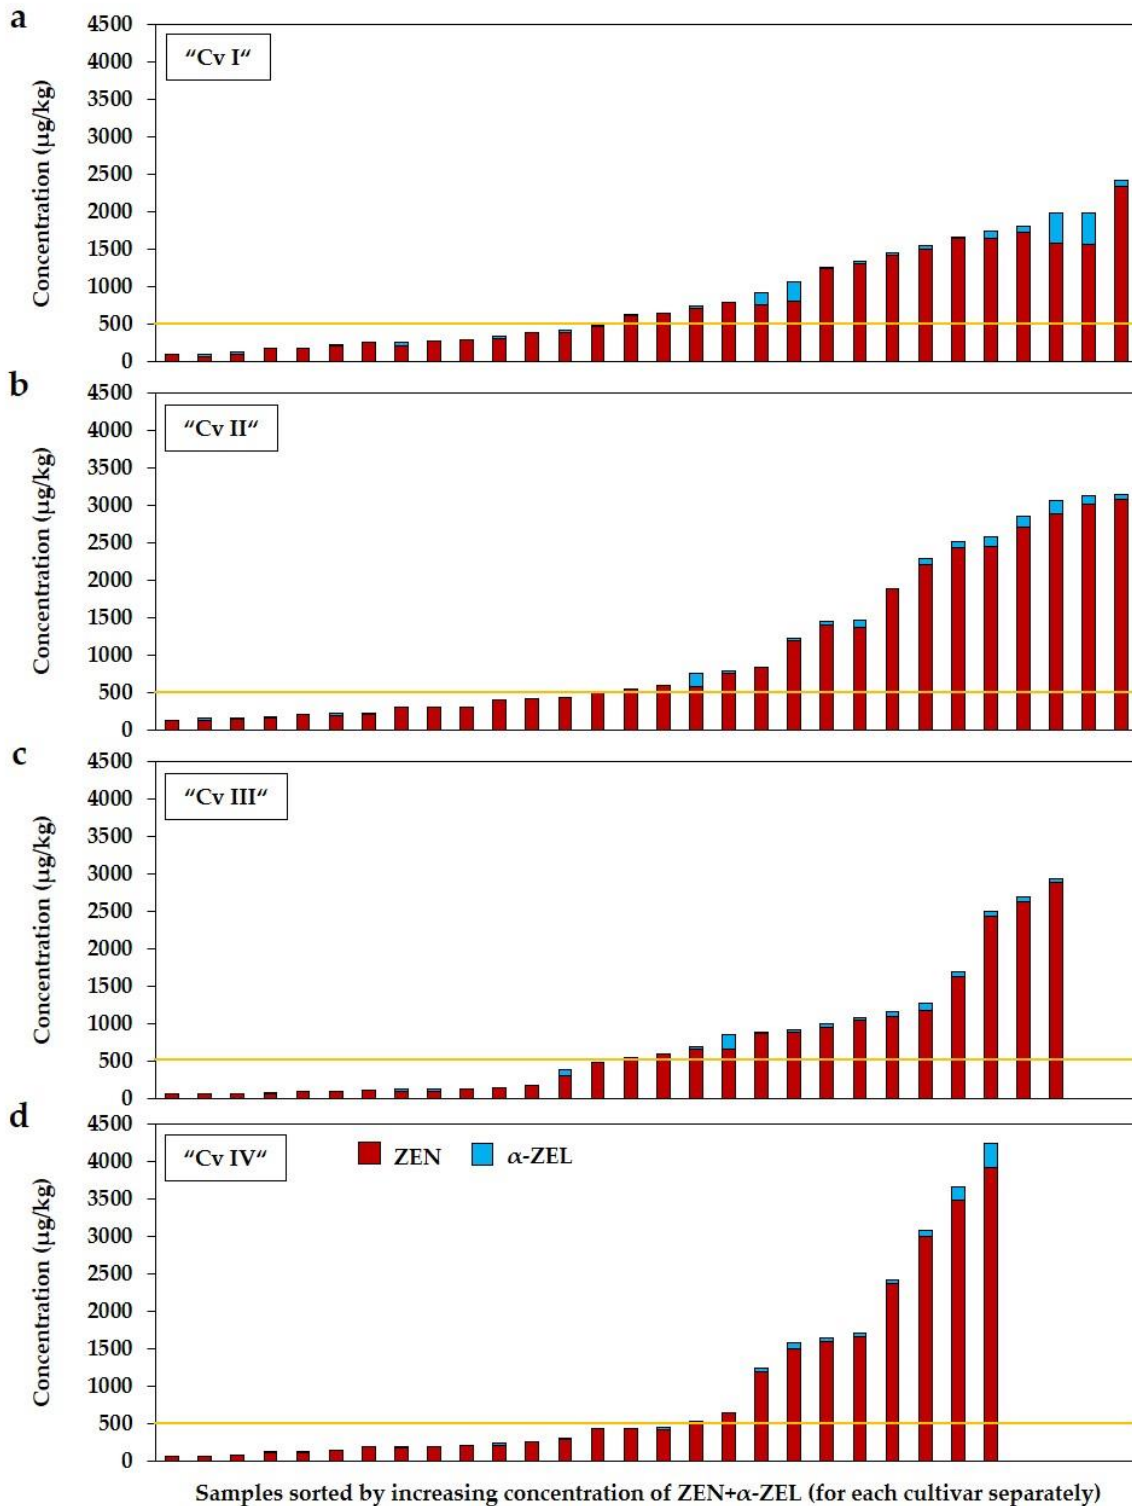

**Figure S3.** Concentrations ( $\mu\text{g/kg}$ ) of ZEN+ $\alpha$ -ZEL in ZEN positive forage maize samples of four different cultivars (Cv) (a–d). Samples were sorted by increasing concentration of ZEN+ $\alpha$ -ZEL for each cultivar separately. The guidance value for ZEN in complementary and complete feeding stuffs (500  $\mu\text{g/kg}$ ) is shown as yellow line. ZEN = zearalenone;  $\alpha$ -ZEL =  $\alpha$ -zearalenol.  $n = 120$ .
